# Supplementary material
Source: publisher site journal article supplement (https://www.dovepress.com/get_supplementary_file.php?f=345054.docx)
Supplement: Supplementary file 1 [file get_supplementary_file.php]

**Supplementary Material**

**Description of the Danish registries.**

The present study was based on routinely collected nationwide Danish registry data. Denmark has a state-funded healthcare system ensuring free access to healthcare for all residents.1 We used the following data sources:

- The Danish National Patient Registry contains complete nationwide information on hospital inpatient admissions since 1977 and hospital outpatient clinic and emergency contacts since 1995.2 Each hospital discharge or outpatient visit is recorded with one primary diagnosis and one or more secondary diagnoses coded according to the *International Classification of Diseases*, *Eighth Revision* between 1977 and 1993 and *Tenth Revision* thereafter. We used the Patient Registry to identify the patients with pulmonary hypertension and comorbidities included in Table 1.
- The Danish Cancer Registry has recorded all incident cases of malignant neoplasms in Denmark since 1943 (mandatory since 1987), including information on morphology, histology, and cancer stage at time of diagnosis.3 Diagnoses in the Cancer Registry generally have high validity, with 95%–98% completeness and accuracy of recorded diagnoses. For example, it has been shown that only 3.6% of lung cancers and 1.2% of breast cancers have a missing or incorrect diagnosis code. Cancer cases are coded according to the *International Classification of Diseases, Tenth Revision*. We used this Registry to identify all incident cancers recorded after a pulmonary hypertension diagnosis. We considered all cancers, as well as site-specific cancers, grouped according to the annual cancer report published by the Danish Health Data Authority. Table S1 specifies the site-specific cancers and their corresponding diagnostic codes.
- The Danish Civil Registration System, established in 1968, is updated daily concerning changes in vital status and migration for the entire Danish population.4 A unique 10-digit personal identifier is assigned to all residents at birth or upon immigration, which enables accurate and unambiguous linkage across all data sources at the individual level.

**References**

1. Schmidt M, Schmidt SAJ, Adelborg K, et al. The Danish health care system and epidemiological research: from health care contacts to database records. *Clin Epidemiol.* 2019;11:563-591.

2. Schmidt M, Schmidt SAJ, Sandegaard JL, Ehrenstein V, Pedersen L, Sørensen HT. The Danish National Patient Registry: a review of content, data quality, and research potential. *Clin Epidemiol.* 2015;7:449-490.

3. Gjerstorff ML. The Danish Cancer Registry. *Scand J Public Health.* 2011;39(7 Suppl):42-45.

4. Schmidt M, Pedersen L, Sørensen HT. The Danish Civil Registration System as a tool in epidemiology. *Eur J Epidemiol.* 2014;29:541-549.

**Table S1*. International Classification of Diseases* (ICD) codes and surgical procedure codes.**

|  | **ICD-8** | **ICD-10** | **Surgical procedure codes*** | |
| --- | --- | --- | --- | --- |
| Pulmonary hypertension |  | I27.0 | |  |
| Chronic thromboembolic pulmonary hypertension |  | I27.2 |  | |
| *Comorbidities* |  |  |  | |
| Hypothyroidism | 244 | E03; E89.0 |  | |
| Hyperthyroidism | 242 | E05 |  | |
| Venous thromboembolism | 450.99; 451.00; 671.01; 671.02 | I26; I80.1-3;O22.3: O87.1 |  | |
| Pulmonary embolism +/- deep venous thromboembolism | 450.99 | I26 |  | |
| Deep venous thrombosis | 451.00; 671.01; 671.02 but no 450.99 any time before index date | I80.1-3; O22.3; O87.1 but no I26 any time before index date |  | |
| Chronic obstructive pulmonary disease | 490–493 | J42-46 |  | |
| Interstitial lung disease | 515, 516, 517, 135 | J60-65, J67, J68 (except J68.2), J69, J70 (except J70.8, J70.9), J82,  J84, J99, D76.0, D86.0, D86.2 |  | |
| HIV | 079.83 | B20-B24 |  | |
| Portal hypertension | 456.00, 456.01 | K76.6 |  | |
| Splenectomy |  |  | 48900-48910  KJMA | |
| Connective tissue disorders | 712; 716; 734; 446; 135.99 | M05; M06; M08; M09; D86; M30; M31; M32; M33; M34; M35; M36 |  | |
| Heart failure | 427.09; 427.10; 427.11; 427.19; 428.99; 782.49 | I50; I11.0; I13.0; I13.2 |  | |
| All cancers |  | C00-C96 |  | |
| Stomach |  | C16 |  | |
| Colorectal cancer |  | C18-C20 |  | |
| Liver |  | C22 |  | |
| Pancreas |  | C25 |  | |
| Lung, bronchia and trachea |  | C33-C34 |  | |
| Malignant melanoma |  | C43 |  | |
| Other skin cancer (excl. BCC) |  | C44 (excluding morphology 809) |  | |
| Breast |  | C50 |  | |
| Uterus |  | C54-C55 |  | |
| Prostate |  | C61 |  | |
| Kidney |  | C64 |  | |
| Urinary bladder |  | C67, D090, D095, D303, D414  (D codes are restricted to morphology 812-813) |  | |
| Non-Hodgkin’s lymphoma |  | C82-C86, C90 |  | |
| Metastases and non-specified cancer in the lymph nodes |  | C77-C79 |  | |
| Basal cell carcinoma |  | C44 (restricted to morphology 809) |  | |
| Other sites |  | All ICD-10 codes not listed above |  | |

*Surgical procedure codes were assigned according to the Danish National Board of Health Classification of Surgical Procedures until 31 December 1995 and according to the Nordic Medico-Statistical Committee (NOMESCO) Classification of Surgical Procedures (NCSP) thereafter.
